# Supplementary material for: Plasma metabolic profiling analysis of normal and ANIT-induced cholestasis rats after oral administration of Da-Huang-Xiao-Shi decoction using UHPLC-Q-Orbitrap MS coupled with pattern recognition
Source: Royal Society of Chemistry journal article supplement (doi:10.1039/c8ay01945b), 2018-01-01
Supplement: c8ay01945b1.pdf [file c8ay01945b1.pdf]

## Supporting Information

Plasma metabolic profiling analysis of normal and ANIT-induced cholestasis rats after oral administration of Da-Huang-Xiao-Shi decoction by UHPLC-Q-Orbitrap MS coupled with pattern recognition

Guoxue Zhu, Yiling Chen, Qing Hu, Qianying Zhang, Qi Lv, Fang Feng\*

### **\*Correspondence**

Prof. Fang Feng. China Pharmaceutical University, TongJia Lane No. 24, Nanjing 210009, P.R. China,

E-mail addresses: [fengfangl@hotmail.com](mailto:fengfangl@hotmail.com)

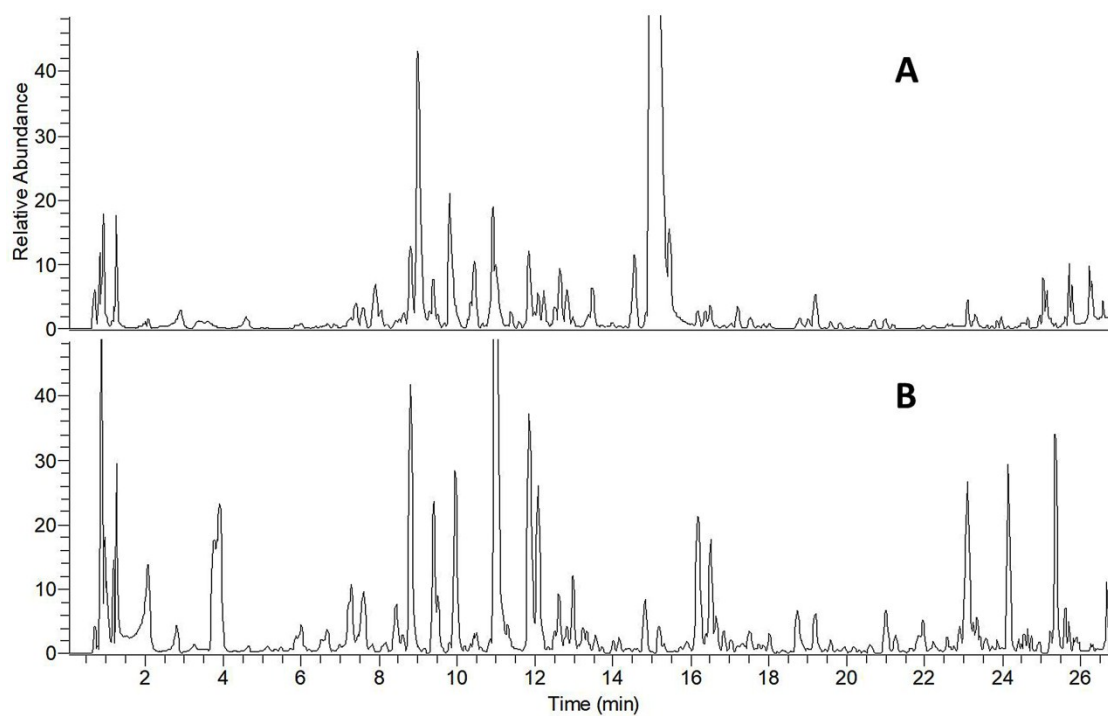

**Fig.S1** Total ion chromatogram of DHXSD extract in positive-ion mode (A) and negative-ion mode (B)

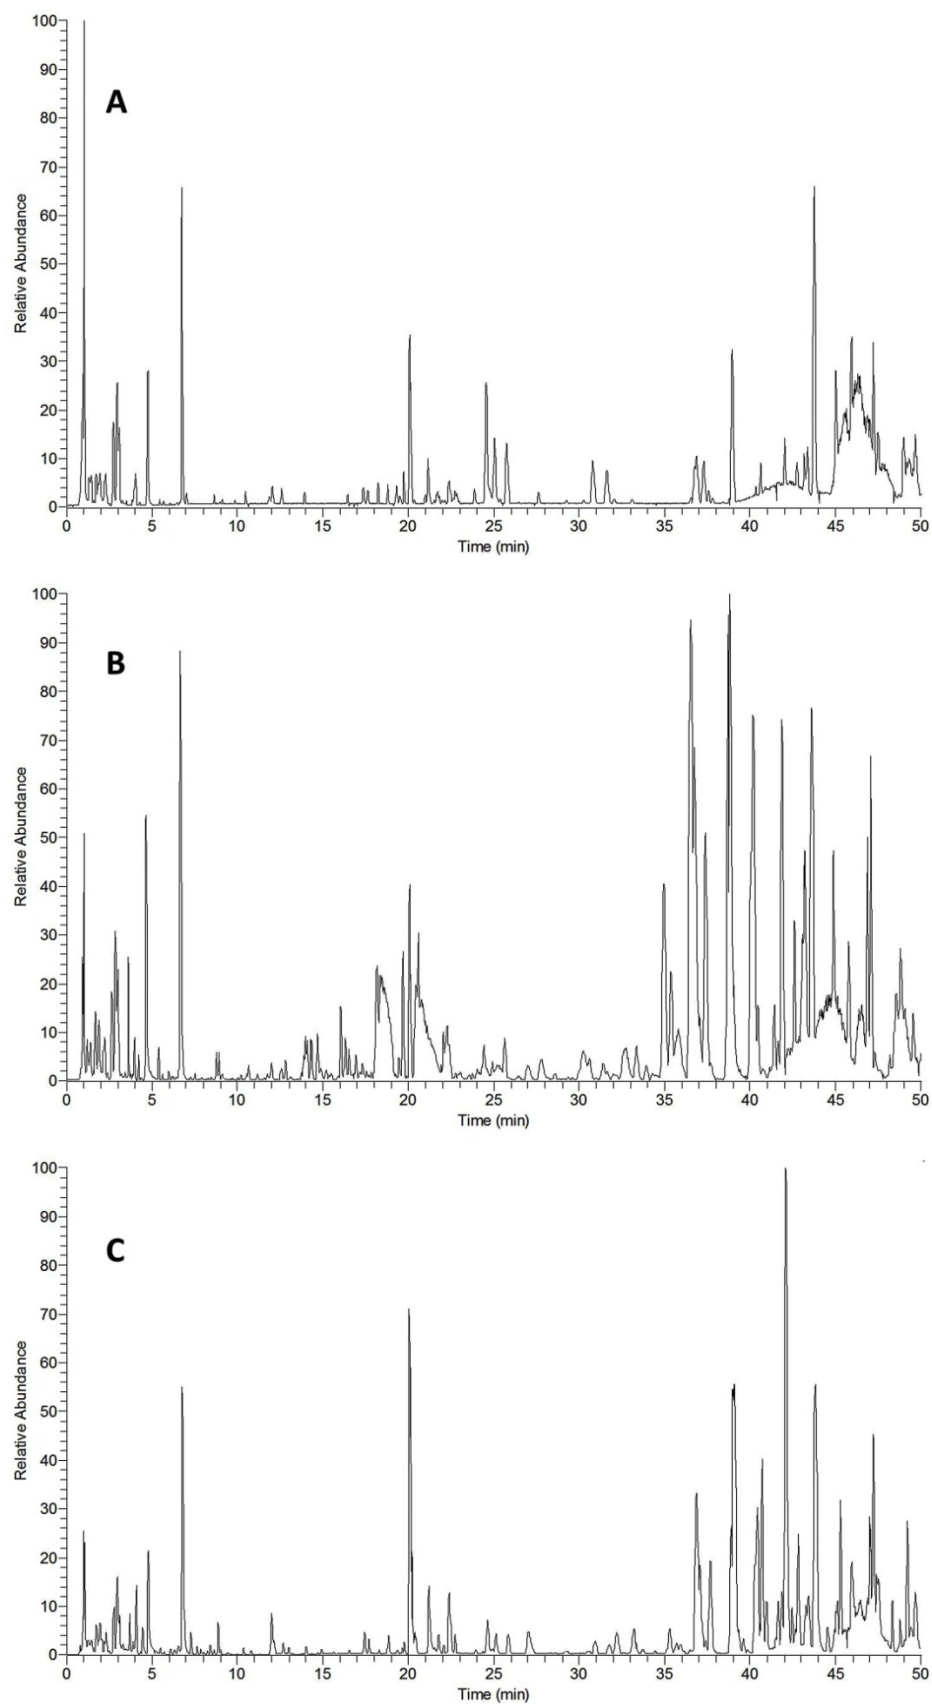

**Fig.S2** The UHPLC-Q-Orbitrap MS total ion chromatograms of normal group, normal-DHXSD group and ANIT-DHXSD group plasma in positive mode.

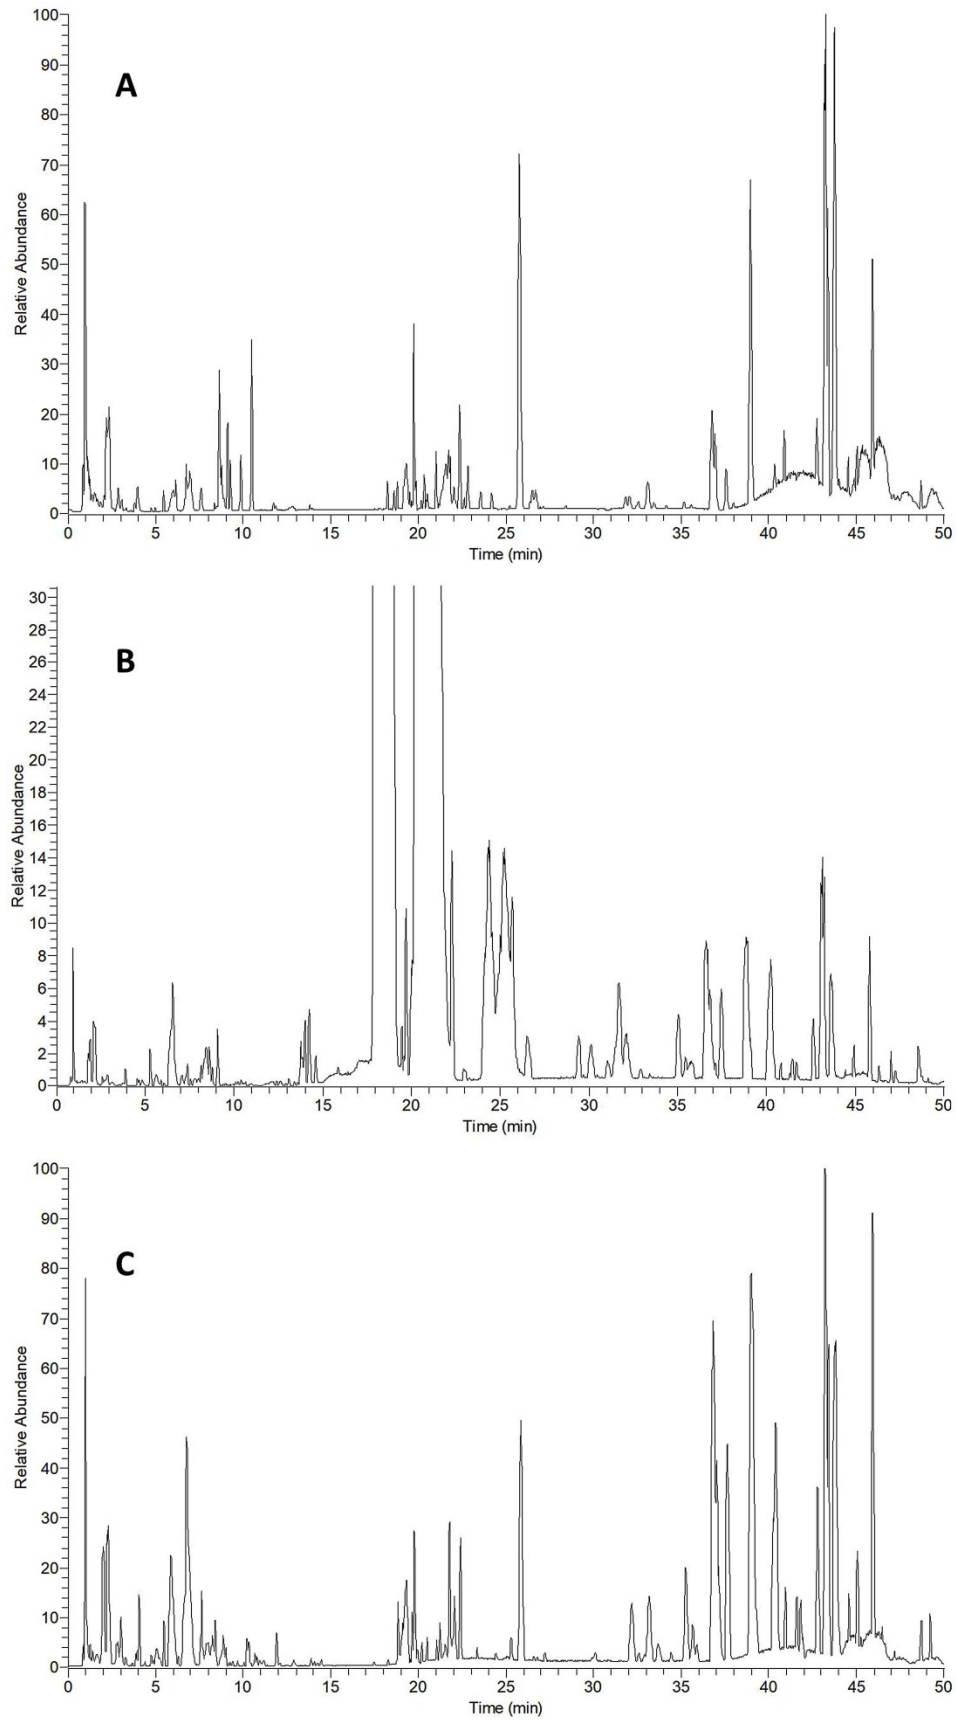

**Fig.S3** The UHPLC-Q-Orbitrap MS total ion chromatograms of normal group, normal-DHXSD group and ANIT-DHXSD group plasma in negative mode.

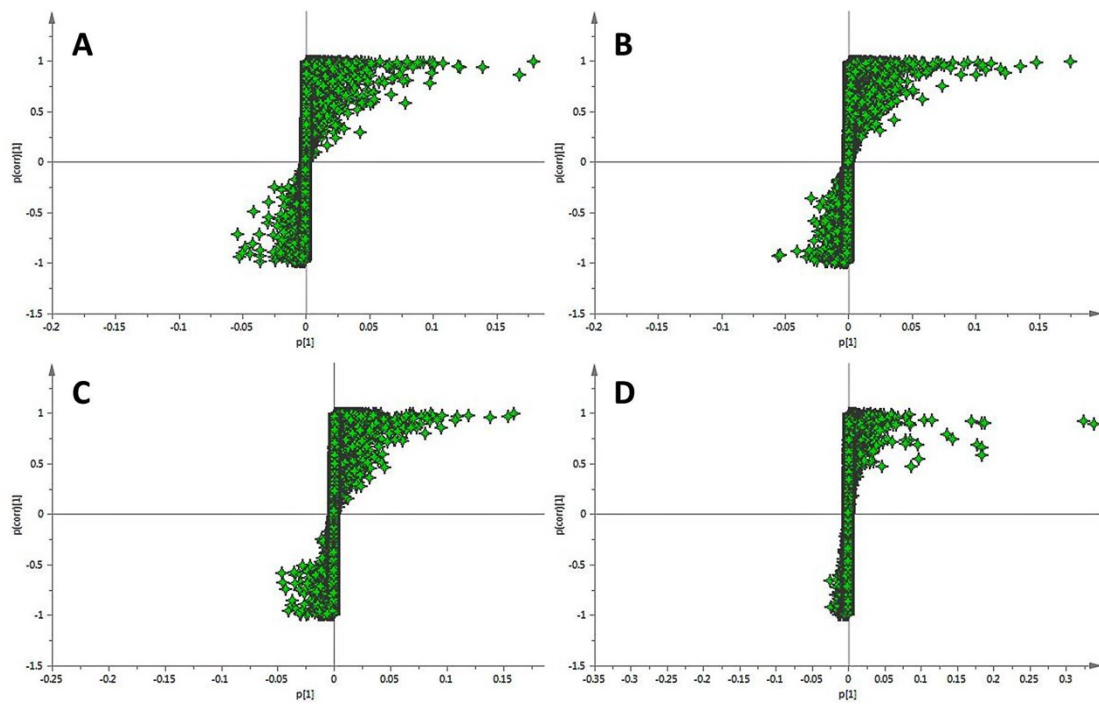

**Fig.S4** S-plot of OPLS-DA model between normal group plasma samples and normal-DHXSD group plasma samples in positive ion mode (A) and negative ion mode (B); S-plot of OPLS-DA model between normal group plasma samples and ANIT-DHXSD group plasma samples in positive ion mode (C) and negative ion mode (D).

Table S1 Effect of ANIT on serum ALT, AST, ALP, TBIL, DBIL, and TBA, and  $\gamma$ -GT (n = 6, mean  $\pm$  SD).

| Groups | ALT (U/L)                 | AST (U/L)                  | ALP (U/L)                | TBIL ( $\mu$ mol/L)       | DBIL( $\mu$ mol/L)      | TBA ( $\mu$ mol/L)        | $\gamma$ -GT (U/L)    |
|--------|---------------------------|----------------------------|--------------------------|---------------------------|-------------------------|---------------------------|-----------------------|
| Con    | 28.1037 $\pm$ 4.9807      | 149.6701 $\pm$ 18.2468     | 225.2167 $\pm$ 27.8659   | 15.1608 $\pm$ 2.4671      | 8.4601 $\pm$ 2.7097     | 33.0127 $\pm$ 14.8017     | 1.6571 $\pm$ 0.8031   |
| Mod    | 501.6801 $\pm$ 51.6792*** | 890.3482 $\pm$ 109.4793*** | 603.5777 $\pm$ 79.5632** | 187.3584 $\pm$ 29.9641*** | 89.3571 $\pm$ 19.3689** | 168.9036 $\pm$ 19.3702*** | 7.2803 $\pm$ 1.1357** |

Alanine transaminase (ALT); aspartate transaminase (AST); alkaline phosphatase (ALP); total bilirubin (TBIL); direct bilirubin (DBIL); total bile acid (TBA); and  $\gamma$ -glutamyltranspeptidase ( $\gamma$ -GT); \*\*p < 0.01, \*\*\*p < 0.001 compared with control group.

Table S2 Identification of prototype constituents of DHXSD in rat plasma by UHPLC-Q-Orbitrap MS under physiological and ANIT-induced cholestasis status.

| NO.             | t <sub>R</sub> | Formula                                          | Detected[M] | Diff   | Accurate Weight | ESI <sup>+</sup> / ESI <sup>-</sup>            | Identification                         | Source |
|-----------------|----------------|--------------------------------------------------|-------------|--------|-----------------|------------------------------------------------|----------------------------------------|--------|
| <b>Positive</b> |                |                                                  |             |        |                 |                                                |                                        |        |
| P1              | 3.18           | C <sub>11</sub> H <sub>18</sub> ON               | 180.1381    | -3.886 | 180.1388        | 121.0646                                       | Candicine                              | HB     |
| P2              | 7.23           | C <sub>20</sub> H <sub>24</sub> O <sub>4</sub> N | 342.1695    | -2.923 | 342.1705        | 192.1017,177.0778                              | Phellodendrine                         | HB     |
| P3              | 7.47           | C <sub>20</sub> H <sub>26</sub> O <sub>4</sub> N | 344.1833    | -8.475 | 344.1862        | 299.1258,175.0751                              | Tembetarine                            | HB     |
| P4              | 7.81           | C <sub>20</sub> H <sub>24</sub> O <sub>4</sub> N | 342.1695    | -2.923 | 342.1705        | 297.1100,282.0867,265.0844, 237.0903, 192.0999 | Magnoflorine                           | HB     |
| P5              | 8.19           | C <sub>23</sub> H <sub>30</sub> O <sub>8</sub> N | 448.1946    | -6.038 | 447.1893        | 286.1419                                       | N-Methylhigenamine-7-O-glucopyranoside | HB     |
| P6              | 8.57           | C <sub>19</sub> H <sub>24</sub> NO <sub>3</sub>  | 314.1731    | -2.865 | 314.1740        | 269.1157,192.1020,177.0901                     | Oblongine                              | HB     |
| P7              | 8.59           | C <sub>21</sub> H <sub>26</sub> O <sub>4</sub> N | 356.1834    | -7.861 | 356.1862        | 311.1260,279.0998                              | Menisperine                            | HB     |
| P8              | 9.45           | C <sub>19</sub> H <sub>16</sub> NO <sub>4</sub>  | 322.1207    | -0.931 | 322.1210        | 307.0835, 292.1150                             | Berberrubine                           | HB     |
| P9              | 9.71           | C <sub>20</sub> H <sub>18</sub> NO <sub>5</sub>  | 352.1197    | -0.854 | 351.1120        | 337.0919,336.0847, 322.0692, 308.0896          | Oxyberberine                           | HB     |
| P10             | 11.30          | C <sub>20</sub> H <sub>20</sub> ON <sub>4</sub>  | 338.1365    | -7.985 | 338.1392        | 323.1125,308.0897,294.1107,280.0922            | Columbamine                            | HB     |
| P11             | 11.90          | C <sub>20</sub> H <sub>18</sub> ON <sub>4</sub>  | 336.1209    | -8.033 | 336.1236        | 321.0969,306.0739,292.0952,278.0798            | Berberine                              | HB     |
| P12             | 11.95          | C <sub>20</sub> H <sub>20</sub> ON <sub>4</sub>  | 338.1268    | -1.183 | 338.1272        | 323.1125,308.0897,294.1107,280.0922            | Jatrorrhizine                          | HB     |
| P13             | 12.10          | C <sub>21</sub> H <sub>22</sub> ON <sub>4</sub>  | 352.1519    | 2.556  | 352.1510        | 337.1282,336.1209,322.1052,309.1294,308.1261   | Palmatine                              | HB     |
| <b>Negative</b> |                |                                                  |             |        |                 |                                                |                                        |        |
| P14             | 2.18           | C <sub>7</sub> H <sub>12</sub> O <sub>6</sub>    | 191.0108    | 4.166  | 192.0180        | 173.0094,154.9989                              | Quinic acid                            | HB     |
| P15             | 5.96           | C <sub>16</sub> H <sub>24</sub> O <sub>11</sub>  | 391.1238    | -0.255 | 392.1319        | 229.0715,211.0615,185.0818,167.0713,149.0607   | Shanzhiside                            | ZZ     |
| P16             | 6.05           | C <sub>16</sub> H <sub>22</sub> O <sub>10</sub>  | 373.1130    | -0.802 | 374.1213        | 211.0618,193.0506,167.0715,149.0607            | Geniposidic acid                       | ZZ     |

|     |       |                                                 |          |        |          |                                                        |                                                                 |    |
|-----|-------|-------------------------------------------------|----------|--------|----------|--------------------------------------------------------|-----------------------------------------------------------------|----|
| P17 | 6.36  | C <sub>17</sub> H <sub>24</sub> O <sub>11</sub> | 449.1298 | 0.742  | 404.1319 | 241.0715, 223.0610,101.0244                            | Scandoside methylester                                          | ZZ |
| P18 | 6.40  | C <sub>17</sub> H <sub>24</sub> O <sub>11</sub> | 449.1298 | 9.650  | 404.1319 | 241.0715,223.0610,205.0505,191.0347                    | Gardenoside                                                     | ZZ |
| P19 | 6.72  | C <sub>16</sub> H <sub>26</sub> O <sub>8</sub>  | 345.1552 | 1.156  | 346.1628 | 169.0926                                               | Jasminoside B                                                   | ZZ |
| P20 | 6.82  | C <sub>30</sub> H <sub>26</sub> O <sub>12</sub> | 577.1354 | 1.730  | 578.1424 | 425.0905,289.0710                                      | Procyanidin B                                                   | ZZ |
| P21 | 7.36  | C <sub>10</sub> H <sub>16</sub> O <sub>3</sub>  | 183.0296 | 3.804  | 184.0369 | 168.0063,139.0036,124.0164                             | Jasminodiol                                                     | ZZ |
| P22 | 7.79  | C <sub>17</sub> H <sub>20</sub> O <sub>9</sub>  | 367.1033 | -2.988 | 368.1102 | 193.0505,191.0560,173.0454,134.0374,111.0449           | 3-O-feruloylquinic acid                                         | HB |
| P23 | 8.02  | C <sub>23</sub> H <sub>34</sub> O <sub>15</sub> | 595.1880 | 1.091  | 550.1898 | 225.0768,207.0660,123.0451,101.0244                    | Genipin-1-β-D-gentiobioside                                     | ZZ |
| P24 | 8.80  | C <sub>17</sub> H <sub>24</sub> O <sub>10</sub> | 433.1337 | 7.214  | 388.1369 | 225.0769,207.0662,123.0450,101.0243                    | Geniposide                                                      | ZZ |
| P25 | 9.05  | C <sub>17</sub> H <sub>20</sub> O <sub>9</sub>  | 367.1033 | -2.988 | 368.1102 | 193.0505,191.0566,175.0401,173.0464,134.0374, 111.0450 | 5-O-feruloylquinic acid                                         | HB |
| P26 | 9.49  | C <sub>16</sub> H <sub>26</sub> O <sub>7</sub>  | 375.1658 | 1.181  | 330.1679 | 167.0211,149.0457, 121.0295                            | Jasminoside A/E                                                 | ZZ |
| P27 | 9.69  | C <sub>16</sub> H <sub>26</sub> O <sub>7</sub>  | 375.1658 | 1.181  | 330.1679 | 167.0210,149.0455,121.0294                             | Jasminoside A/E                                                 | ZZ |
| P28 | 10.85 | C <sub>10</sub> H <sub>16</sub> O <sub>3</sub>  | 183.1025 | 3.259  | 184.1099 | 139.1128                                               | Jasminodiol                                                     | ZZ |
| P29 | 11.18 | C <sub>15</sub> H <sub>10</sub> O <sub>5</sub>  | 269.0450 | 0.741  | 270.0528 | 241.04690,239.0337, 223.0399                           | Aloe-emodin                                                     | DH |
| P30 | 13.22 | C <sub>32</sub> H <sub>40</sub> O <sub>17</sub> | 695.2208 | -8.199 | 695.2265 | 225.0759,101.0243                                      | 6"-O-trans-feruloylgenipingentiobioside                         | ZZ |
| P31 | 16.62 | C <sub>31</sub> H <sub>32</sub> O <sub>16</sub> | 659.1622 | 1.818  | 660.1690 | 497.1294,335.0748,161.0454                             | 3,5-di-O-Caffeoyl-4-O-(3-hydroxy-3-methyl)-glutaroylquinic acid | ZZ |
| P32 | 17.32 | C <sub>15</sub> H <sub>10</sub> O <sub>4</sub>  | 253.0501 | 0.787  | 254.0579 | 225.0551,181.0209                                      | Chrysophanol                                                    | DH |
| P33 | 21.45 | C <sub>15</sub> H <sub>8</sub> O <sub>6</sub>   | 283.0238 | -1.056 | 284.0321 | 239.0359,211.0411,183.0459                             | Rhein                                                           | DH |
| P34 | 21.48 | C <sub>16</sub> H <sub>12</sub> O <sub>5</sub>  | 283.0618 | 4.576  | 284.0685 | 240.0382,239.0347,212.0440,211.0396                    | Physcion                                                        | DH |
| P35 | 25.16 | C <sub>15</sub> H <sub>10</sub> O <sub>5</sub>  | 269.0450 | 0.741  | 270.0528 | 241.0504,225.0555                                      | Emodin                                                          | DH |



Table S3 Identification of metabolites of DHXSD in rat plasma by UHPLC-Q-Orbitrap MS under physiological and ANIT-induced cholestasis status.

| NO.             | t <sub>R</sub> | Formula                                            | Detected[M] | Diff (ppm) | Accurate Weight | ESI <sup>+</sup> / ESI <sup>-</sup>                       | Identification                                                              | Source |
|-----------------|----------------|----------------------------------------------------|-------------|------------|-----------------|-----------------------------------------------------------|-----------------------------------------------------------------------------|--------|
| <b>Positive</b> |                |                                                    |             |            |                 |                                                           |                                                                             |        |
| M1              | 4.26           | C <sub>11</sub> H <sub>15</sub> NO <sub>3</sub>    | 209.0912    | -8.996     | 209.1052        | 193.0854,192.0653, 175.0854,163.0864                      | Genipinine                                                                  | HB     |
| M2              | 5.14           | C <sub>26</sub> H <sub>32</sub> NO <sub>10</sub>   | 518.2000    | -5.017     | 518.2026        | 342.1703,192.1021,177.0787                                | Phellodendrine-O-glucuronide                                                | HB     |
| M3              | 5.17           | C <sub>24</sub> H <sub>28</sub> NO <sub>9</sub>    | 474.1743    | -4.429     | 474.1764        | 298.1416, 283.1187                                        | Hydromethyl arnepavine-O-glucuronide                                        | HB     |
| M4              | 9.23           | C <sub>26</sub> H <sub>26</sub> NO <sub>13</sub> S | 592.1172    | 7.938      | 592.1125        | 416.0843,336.1216, 321.1015,<br>306.0724,278.0849         | Berberine-O-sulfate-O-glucuronide                                           | HB     |
| M5              | 9.39           | C <sub>25</sub> H <sub>26</sub> NO <sub>10</sub>   | 500.1542    | -2.999     | 500.1557        | 324.1208, 309.0977,308.0906,280.0957                      | Demethyleneberberine-O-glucuronide                                          | HB     |
| M6              | 12.06          | C <sub>20</sub> H <sub>20</sub> NO <sub>6</sub>    | 370.1288    | -0.811     | 370.1291        | 352.1162, 337.0952,308.0917, 293.1252                     | Dihydroxyberberine                                                          | HB     |
| M7              | 12.79          | C <sub>19</sub> H <sub>16</sub> NO <sub>6</sub>    | 354.0950    | 1.694      | 354.0890        | 336.0844, 321.0604,306.0376,292.0587                      | Dihydroxyberberrubine                                                       | HB     |
| M8              | 21.40          | C <sub>19</sub> H <sub>18</sub> NO <sub>4</sub>    | 324.1267    | -0.926     | 324.1270        | 306.1104, 278.0800                                        | Demethyleneberberine                                                        | HB     |
| <b>Negative</b> |                |                                                    |             |            |                 |                                                           |                                                                             |        |
| M9              | 6.04           | C <sub>16</sub> H <sub>22</sub> O <sub>10</sub>    | 373.0920    | 5.880      | 374.1213        | 211.0613,193.0512,167.0714,158.0837,14<br>9.0607,123.0451 | Geniposidic acid                                                            | ZZ     |
| M10             | 7.09           | C <sub>16</sub> H <sub>24</sub> O <sub>9</sub>     | 359.1345    | 1.388      | 360.1420        | 341.1239,323.1127, 165.0917                               | Ring-opened and methyl formate removal<br>derivative of genipin glucuronide | DH     |
| M11             | 7.84           | C <sub>17</sub> H <sub>20</sub> O <sub>11</sub>    | 399.0930    | 1.000      | 400.1006        | 223.0609,208.0376,193.0140                                | Sinapoyl glucuronide                                                        | ZZ     |
| M12             | 7.93           | C <sub>11</sub> H <sub>14</sub> O <sub>8</sub> S   | 305.0334    | 0.163      | 306.0409        | 225.0612,207.0509, 175.0611                               | Genipin-O-sulfate                                                           | ZZ     |
| M13             | 8.07           | C <sub>11</sub> H <sub>14</sub> O <sub>8</sub> S   | 305.0348    | 6.208      | 306.0409        | 225.0765,207.0661,193.0505                                | Genipin-O-sulfate                                                           | ZZ     |

|     |       |                                                  |          |        |          |                                                           |                                                                             |    |
|-----|-------|--------------------------------------------------|----------|--------|----------|-----------------------------------------------------------|-----------------------------------------------------------------------------|----|
| M14 | 8.78  | C <sub>17</sub> H <sub>22</sub> O <sub>11</sub>  | 401.1087 | -0.497 | 402.1162 | 225.0764,207.0661,193.0354,175.0248,<br>123.0451,101.0244 | Genipin-O-glucuronide                                                       | ZZ |
| M15 | 9.58  | C <sub>16</sub> H <sub>24</sub> O <sub>9</sub>   | 359.1346 | 0.167  | 360.1420 | 183.1025,165.0919                                         | Ring-opened and methyl formate removal<br>derivative of genipin glucuronide | DH |
| M16 | 9.80  | C <sub>16</sub> H <sub>24</sub> O <sub>8</sub>   | 343.1397 | 0.413  | 344.1471 | 167.0210,149.0245,131.0714                                | Ring-opened and reduced product of<br>genipin-O-glucuronide                 | ZZ |
| M17 | 10.16 | C <sub>17</sub> H <sub>22</sub> O <sub>10</sub>  | 385.1143 | 2.590  | 386.1213 | 209.0665,193.0505,159.0295                                | Ring-opened dehydroxylation product of<br>genipin-O-glucuronide             | DH |
| M18 | 10.40 | C <sub>17</sub> H <sub>20</sub> O <sub>10</sub>  | 383.0981 | 1.302  | 384.1056 | 207.0509,189.0770,147.0452,119.0502                       | Dehydroxylation product of genipin-O-<br>glucuronide                        | ZZ |
| M19 | 10.52 | C <sub>17</sub> H <sub>20</sub> O <sub>10</sub>  | 383.0982 | 1.562  | 384.1056 | 207.0661,192.0428                                         | Dehydroxylation product of genipin-O-<br>glucuronide                        | ZZ |
| M20 | 10.93 | C <sub>11</sub> H <sub>14</sub> O <sub>5</sub>   | 225.0614 | -5.308 | 226.0841 | 207.0509,193.0504,175.0248                                | Genipin                                                                     | ZZ |
| M21 | 11.04 | C <sub>15</sub> H <sub>10</sub> O <sub>8</sub> S | 349.0024 | 2.286  | 350.0096 | 269.0447,241.1079,225.0616,213.1132                       | Emodin-O-sulfate                                                            | DH |
| M22 | 11.89 | C <sub>21</sub> H <sub>16</sub> O <sub>13</sub>  | 475.0662 | 2.353  | 476.0630 | 299.0199,271.0246,255.0292                                | Emodin acid monoglucuronide                                                 | DH |
| M23 | 11.91 | C <sub>28</sub> H <sub>30</sub> O <sub>16</sub>  | 621.1483 | 4.661  | 622.1534 | 283.0256,240.0744,212.0023                                | physcion-O-glucoside-O-glucuronide                                          | DH |
| M24 | 12.69 | C <sub>27</sub> H <sub>28</sub> O <sub>15</sub>  | 591.1356 | 1.368  | 592.1355 | 253.0502,225.0564,182.0371                                | Chrysophanol-O-glucoside-O-glucuronide                                      | DH |
| M25 | 13.09 | C <sub>21</sub> H <sub>16</sub> O <sub>12</sub>  | 459.0566 | 0.869  | 460.0642 | 283.0245,239.0347,255.0297,211.0400,18<br>3.0452          | Rhein-O-glucuronide                                                         | DH |
| M26 | 15.58 | C <sub>18</sub> H <sub>14</sub> O <sub>6</sub>   | 325.0009 | 5.828  | 326.0070 | 282.9908,239.0003,221.9740                                | 2-acetoxymethylchrysophanol                                                 | DH |
| M27 | 15.87 | C <sub>15</sub> H <sub>8</sub> SO <sub>9</sub>   | 362.9914 | 2.885  | 363.9889 | 283.0244,239.0346,211.0391,183.0455                       | Rhein-O-sulfate                                                             | DH |
| M28 | 17.26 | C <sub>21</sub> H <sub>18</sub> O <sub>10</sub>  | 429.0822 | 0.465  | 430.0900 | 253.0502,225.0546,113.0244                                | Chrysophanol-O-glucuronide                                                  | DH |
| M29 | 17.48 | C <sub>21</sub> H <sub>18</sub> O <sub>10</sub>  | 429.0825 | -8.138 | 430.0940 | 253.0502,225.0546                                         | Chrysophanol-O-glucuronide                                                  | DH |
| M30 | 17.85 | C <sub>21</sub> H <sub>18</sub> O <sub>11</sub>  | 445.0772 | 0.673  | 446.0849 | 269.0450,225.0551,113.0244                                | Emodin-O-glucuronide                                                        | DH |

|     |       |                                                 |          |        |          |                            |                            |    |
|-----|-------|-------------------------------------------------|----------|--------|----------|----------------------------|----------------------------|----|
| M31 | 19.26 | C <sub>21</sub> H <sub>18</sub> O <sub>11</sub> | 445.0773 | 0.897  | 446.0849 | 269.0452,239.0356,211.0439 | Aloe-emodin-O-glucuronide  | DH |
| M32 | 21.25 | C <sub>23</sub> H <sub>22</sub> O <sub>11</sub> | 473.0582 | 8.437  | 474.1162 | 297.0395,253.0499          | laccaic acid D glucuronide | ZZ |
| M33 | 24.48 | C <sub>15</sub> H <sub>10</sub> O <sub>6</sub>  | 331.2257 | -1.048 | 286.2320 | 285.2583,211.3235,195.1392 | Hydroxyemodin              | DH |

---
